# Supplementary material
Source: Research Square preprint supplement (doi:10.21203/rs.3.rs-9165072/v1)
Supplement: Supplementary file 1 [file ef2321734830ace41b3c1706.docx]

**Declaration of interests**

The authors declare that they have no known competing interests or personal relationships that could have appeared to influence the work reported in this paper.
